# Supplementary material for: The calcium channel subunit gamma-4 is regulated by MafA and necessary for pancreatic beta-cell specification
Source: PubMed Central journal article supplement (PMC6420573; doi:10.1038/s42003-019-0351-4), 2019-03-15
Supplement: 42003_2019_351_MOESM1_ESM.pdf [file 42003_2019_351_MOESM1_ESM.pdf]

## Supplementary Figure 1

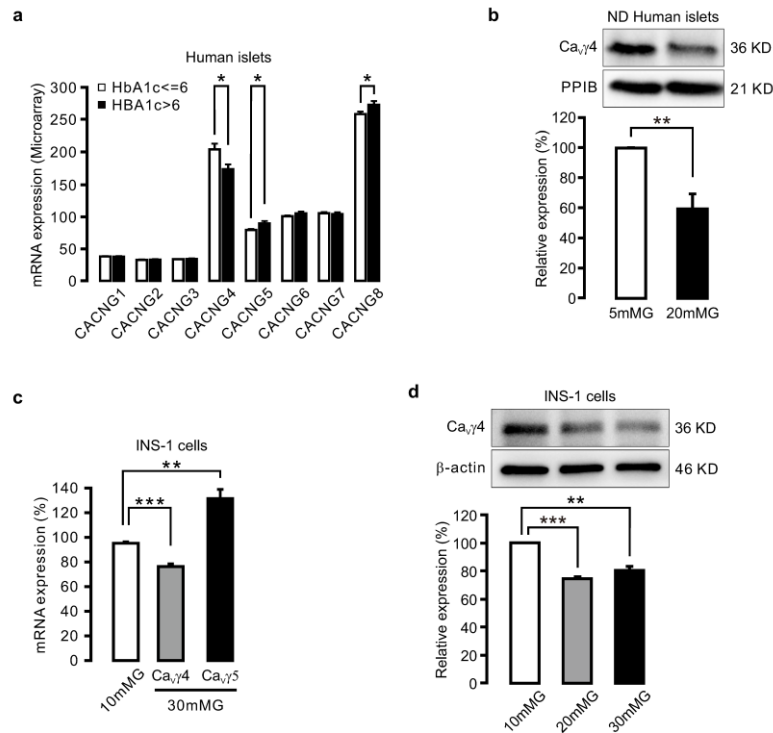

### Supplementary Figure 1. Ca<sub>v</sub>γ4 expression is reduced in beta-cells in response to glucotoxicity.

**(a)** Microarray gene profile showing all Ca<sub>v</sub>γ subunit genes mRNA expression in human pancreatic islets.  $n = 77$  donors for HbA1c  $\leq 6$ , 36 donors for HbA1c  $> 6$ ,  $*p = 0.028$  (Ca<sub>v</sub>γ4),  $*p = 0.012$  (Ca<sub>v</sub>γ5),  $*p = 0.037$  (Ca<sub>v</sub>γ8). **(b)** Decreased Ca<sub>v</sub>γ4 protein expression in ND human islets cultured at 5 or 20 mM glucose (48h).  $n = 3$  donors,  $**p = 0.003$ . See also Supplementary figure 7I, but cultured for 72h.  $n = 5$  donors, not significant. **(c)** Ca<sub>v</sub>γ4 and Ca<sub>v</sub>γ5 mRNA expression in INS-1 cells cultured at 10 or 30 mM glucose for 24h.  $n = 3$ ,  $***p < 0.001$  (Ca<sub>v</sub>γ4),  $**p = 0.001$  (Ca<sub>v</sub>γ5). **(d)** Immunoblotting of Ca<sub>v</sub>γ4 in INS-1 cells cultured at 10, 20 or 30 mM glucose for 72 h.  $n = 4$ ,  $***p < 0.001$  (20 mM),  $**p = 0.009$  (30 mM). Data are presented as Mean  $\pm$  SEM and were analyzed with two-tailed unpaired Student's *t*-test; and the significance in (c-d) were corrected by Holm-Bonferroni method.

## Supplementary Figure 2

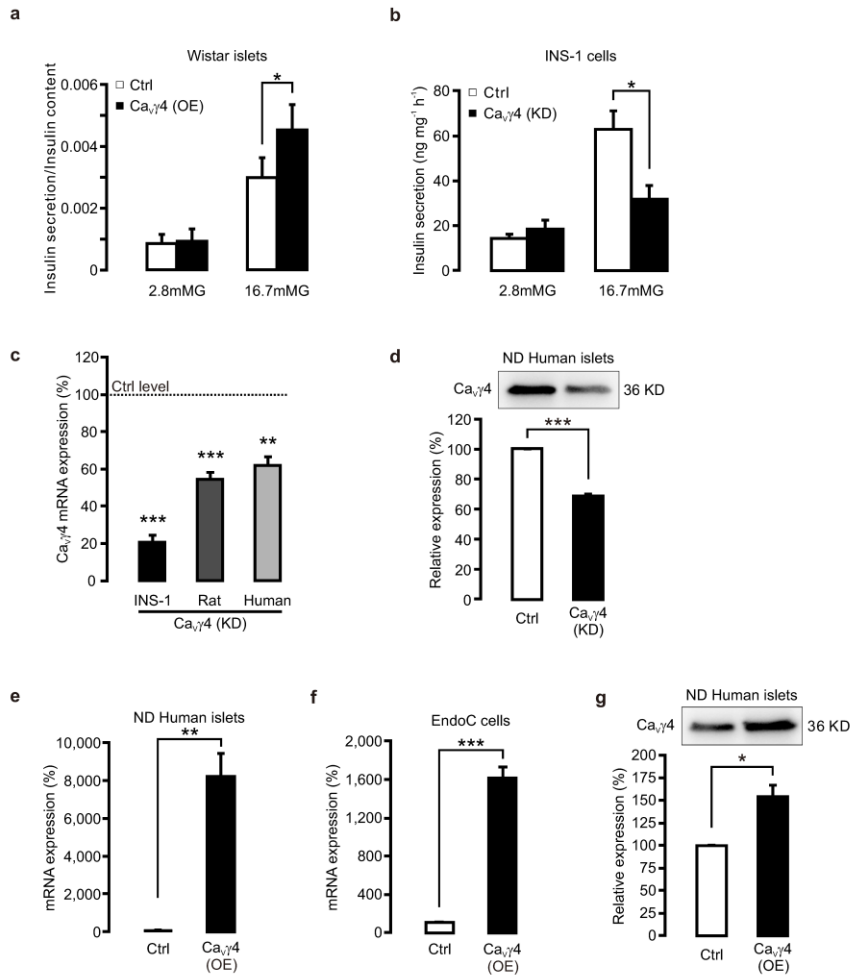

**Supplementary Figure 2. Successful siRNA and lentiviral transfection of Cav $\gamma$ 4 in human beta-cells and the effects on glucose-stimulated insulin secretion (GSIS).** (a) GSIS in Cav $\gamma$ 4 overexpressed Wistar rat islets.  $n = 3$ ,  $*p = 0.027$ . (b) As in (a) but in Cav $\gamma$ 4 silenced INS-1 cells.  $n = 4$ ,  $*p = 0.024$ . (c) Cav $\gamma$ 4 mRNA expression in Cav $\gamma$ 4 silenced INS-1 cells, Wistar rat islets and ND human islets to validate the silencing effect of Cav $\gamma$ 4 siRNA.  $n = 7$  (INS-1,  $***p < 0.001$ ), 4 (rat,  $***p < 0.001$ ) and 3 (human,  $**p = 0.001$ ). (d) Cav $\gamma$ 4 protein expression in Cav $\gamma$ 4 silenced ND human islets normalized by total protein (see Supplementary figure 7n).  $n = 3$  donors,  $***p < 0.001$ . (e) Cav $\gamma$ 4 mRNA expression in Cav $\gamma$ 4 overexpressed ND human islets to validate the Cav $\gamma$ 4 lentiviral overexpressing efficiency.  $n = 3$  donors,  $**p = 0.002$ . (f) As in (e) but in Cav $\gamma$ 4 overexpressed EndoC cells.  $n = 4$ ,  $***p < 0.001$ . (g) As in (d) but in Cav $\gamma$ 4 overexpressed ND human islets normalized by total protein (see Supplementary figure 7o).  $n = 3$  donors,  $*p = 0.014$ . Data are presented as Mean  $\pm$  SEM and were analyzed with two-tailed paired (a) and unpaired (b-g) Student's  $t$ -test.

### Supplementary Figure 3

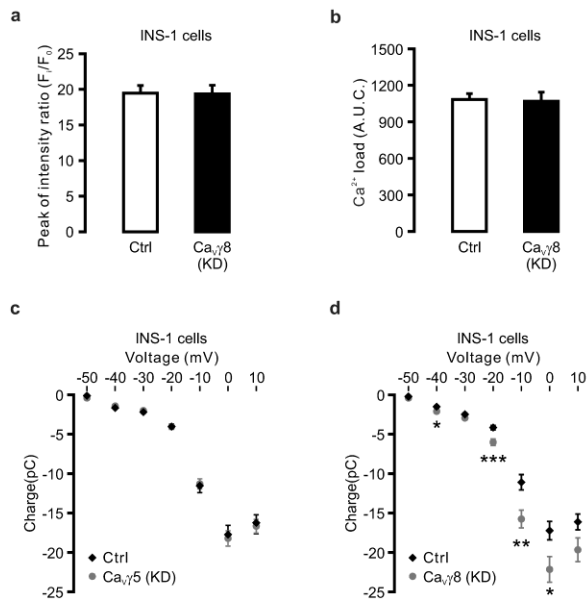

**Supplementary Figure 3. Ca<sup>2+</sup> influx in Cavγ8 silenced INS-1 cells.** (a) Comparison of intracellular Ca<sup>2+</sup> concentration [Ca<sup>2+</sup>]<sub>i</sub> peak intensity (Fi/F<sub>0</sub>) in control and Cavγ8 silenced INS-1 cells by Ca<sup>2+</sup> imaging,  $p = 0.957$ . (b) Integrated Ca<sup>2+</sup> load (Area Under the Curve, A.U.C.) after the stimulation of 70 mM KCl, 0-180s,  $p = 0.867$ , see Figure 3f.  $n = 62$  control and 42 Cavγ8 silencing cells, from 3 independent experiments, for both (a) and (b). (c) Integrated whole-cell Ca<sup>2+</sup> charge-voltage relations in Cavγ5 silenced INS-1 cells.  $n = 53$  control and 57 Cavγ5 silencing cells from 3 independent experiments. (d) As in (c) but in Cavγ8 silenced INS-1 cells.  $n = 41$  control and 40 Cavγ8 silencing cells from 3 independent experiments, \* $p = 0.031$  (-40mV), \*\*\* $p < 0.001$  (-20mV), \*\* $p = 0.003$  (-10mV), \* $p = 0.017$  (0mV). Data are presented as Mean  $\pm$  SEM and were analyzed with two-tailed unpaired Student's *t*-test.

## Supplementary Figure 4

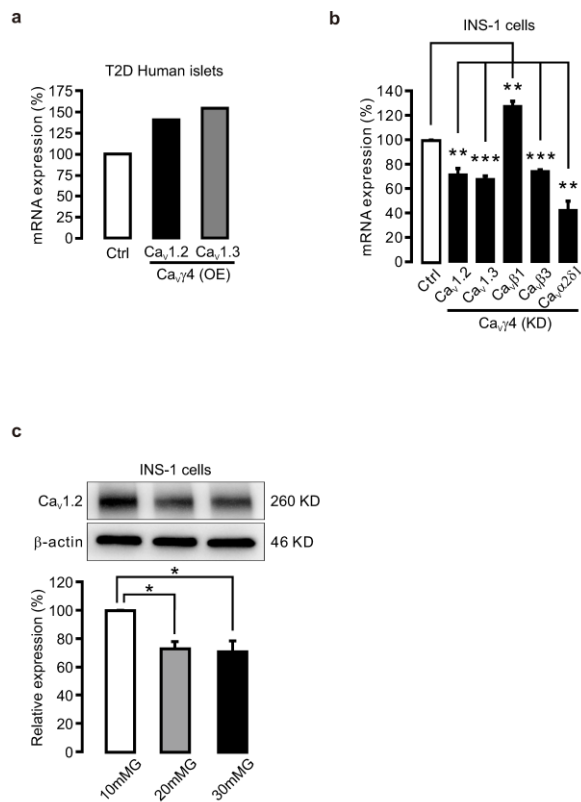

**Supplementary Figure 4. Cav $\gamma$ 4 regulates Cav1.2 and Cav1.3 expression.** (a) Increased tendency of Cav1.2 and Cav1.3 mRNA expression in Cav $\gamma$ 4 overexpressed T2D human islets,  $n = 1$  donor. (b) Cav channels mRNA expression in Cav $\gamma$ 4 silenced INS-1 cells.  $n = 3$ , \*\* $p = 0.004$  (Cav1.2), \*\*\* $p < 0.001$  (Cav1.3), \*\* $p = 0.002$  (Cav $\beta$ 1), \*\*\* $p < 0.001$  (Cav $\beta$ 3), \*\* $p = 0.001$  (Cav $\alpha$ 2 $\delta$ 1). (c) Cav1.2 protein expression in INS-1 cells cultured with 10, 20 or 30 mM glucose.  $n = 4$ , \* $p = 0.012$  (20 mM), \* $p = 0.028$  (30 mM). Data are presented as Mean  $\pm$  SEM and were analyzed with two-tailed unpaired Student's  $t$ -test; and the significance in (a-b) were corrected by Holm-Bonferroni method.

## Supplementary Figure 5

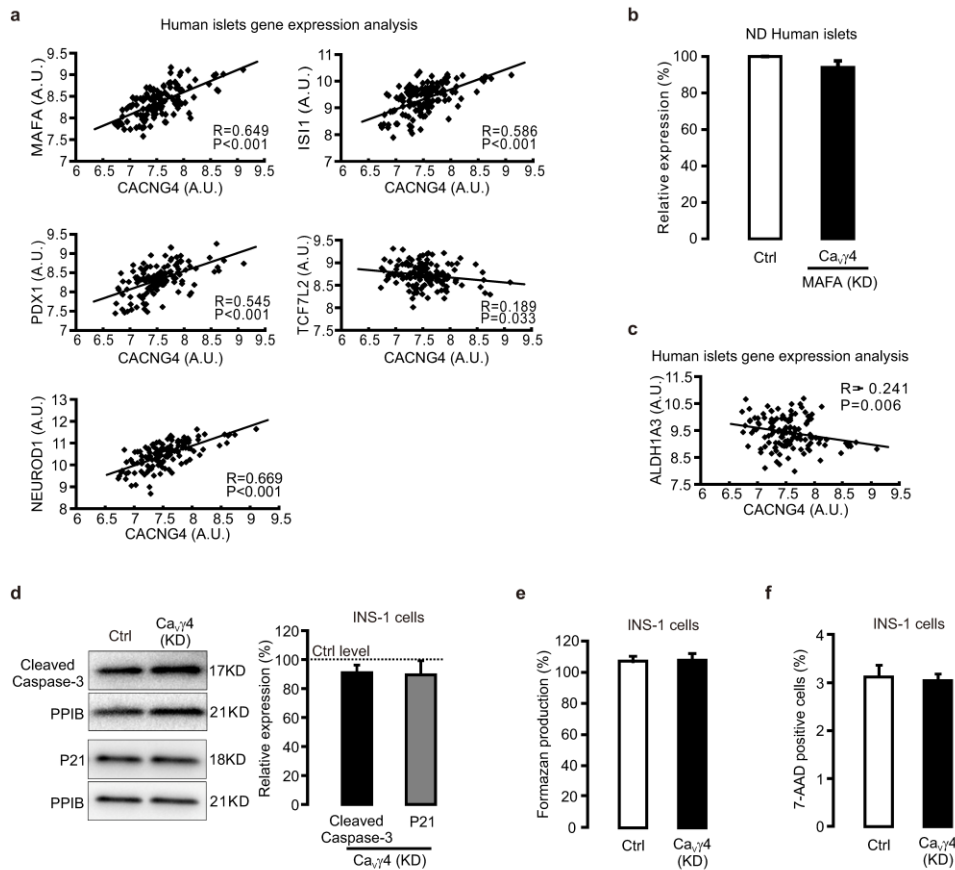

**Supplementary Figure 5. Effect of  $Ca_{\gamma}4$  on beta-cell health.** (a) Correlation of mRNA expressions (Microarray) between  $Ca_{\gamma}4$  (*CACNG4*) and transcription factors *MAFA*, *ISL1*, *PDX1*, *TCF7L2* and *NEUROD1* in human islets.  $n = 128$  donors. Pearson correlation coefficient ( $R$ ) was tested ( $t$ -test) and labeled alongside with  $p$  values. (b)  $Ca_{\gamma}4$  mRNA expression in *MAFA* silenced ND human islets.  $n = 3$  donors,  $p = 0.237$ . (c) Correlation of mRNA expressions (Microarray) between  $Ca_{\gamma}4$  (*CACNG4*) and *ALDH1A3* in human islets.  $n = 128$  donors. (d) Cleaved Caspase-3 and P21 immunoblotting and means of expression in  $Ca_{\gamma}4$  silenced INS-1 cells.  $n = 4$  each,  $p = 0.155$  and  $p = 0.356$ , respectively. (e) Cellular viability (formazan production) measured in  $Ca_{\gamma}4$  silenced INS-1 cells.  $n = 4$ ,  $p = 0.945$ . (f) Cell viability test by 7-AAD staining in  $Ca_{\gamma}4$  silenced INS-1 cells.  $n = 3$ ,  $p = 0.782$ . Data are presented as Mean  $\pm$  SEM and were analyzed with two-tailed unpaired Student's  $t$ -test.

### Supplementary Figure 6

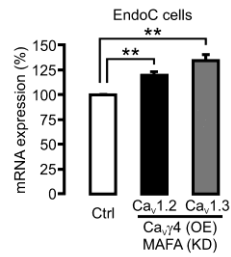

**Supplementary Figure 6. Ca<sub>v</sub>1.2 and Ca<sub>v</sub>1.3 expression in Ca<sub>v</sub>4 overexpressed and MAFA silenced beta-cells.** Increased Ca<sub>v</sub>1.2 and Ca<sub>v</sub>1.3 mRNA expression in Ca<sub>v</sub>4 overexpressed and simultaneously MAFA silenced human EndoC cells.  $n = 4$ ,  $**p = 0.002$  (Ca<sub>v</sub>1.2),  $**p = 0.001$  (Ca<sub>v</sub>1.3). Data are presented as Mean  $\pm$  SEM and were analyzed with two-tailed unpaired Student's  $t$ -test; and the significance were corrected by Holm-Bonferroni method.

## Supplementary Figure 7

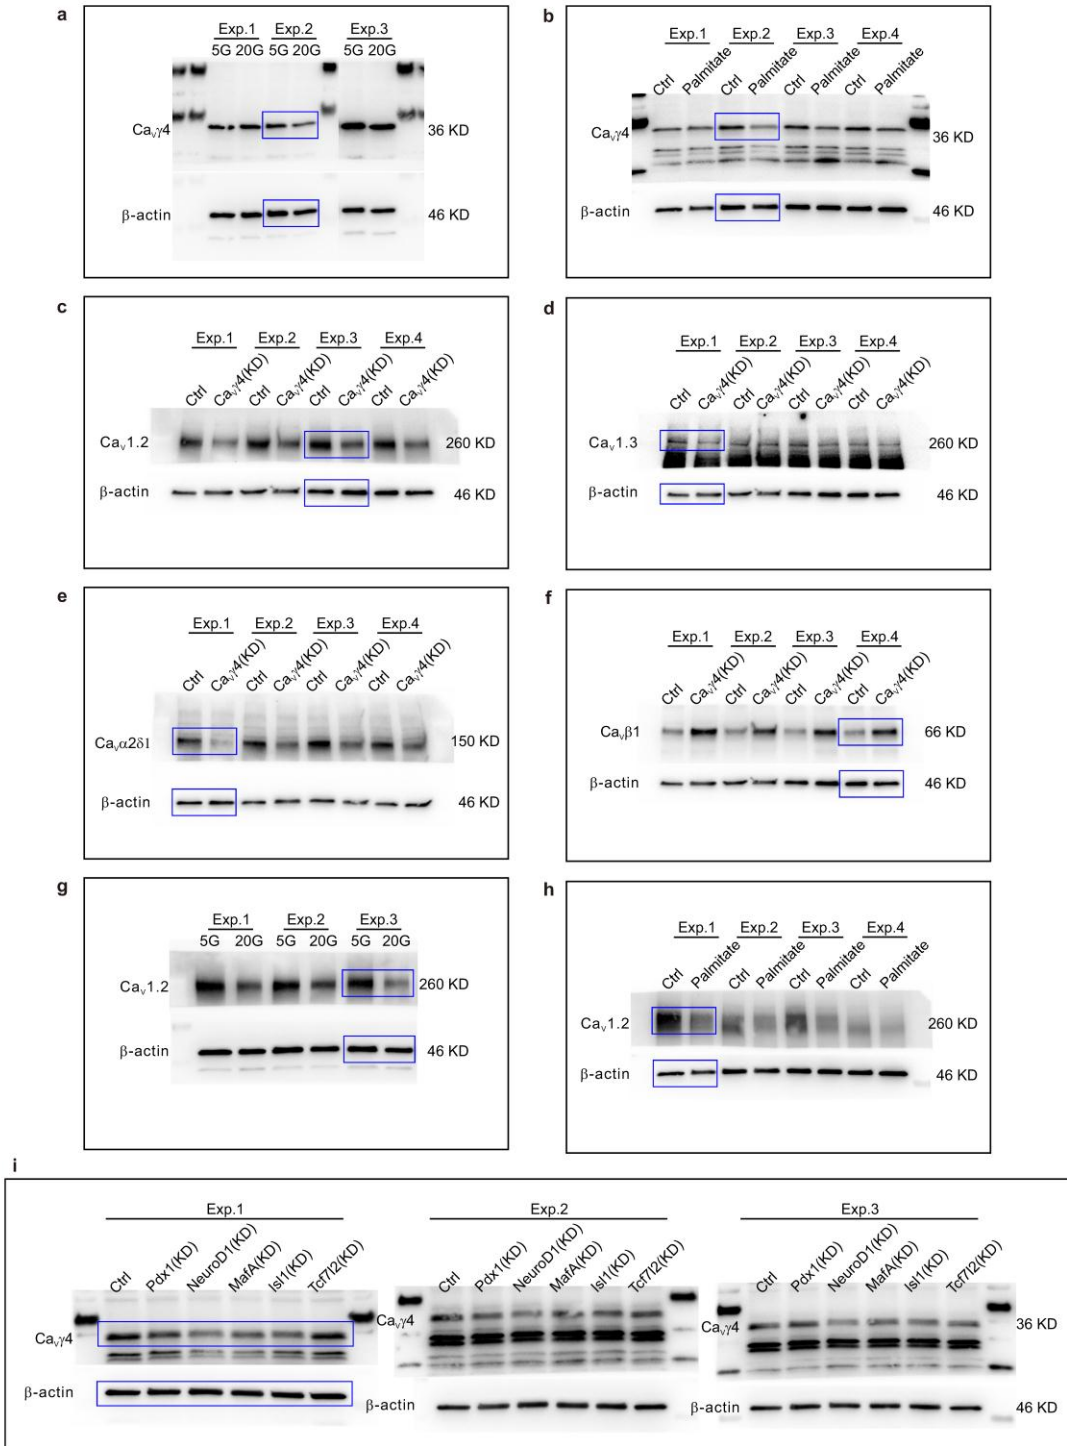

## Supplementary Figure 7

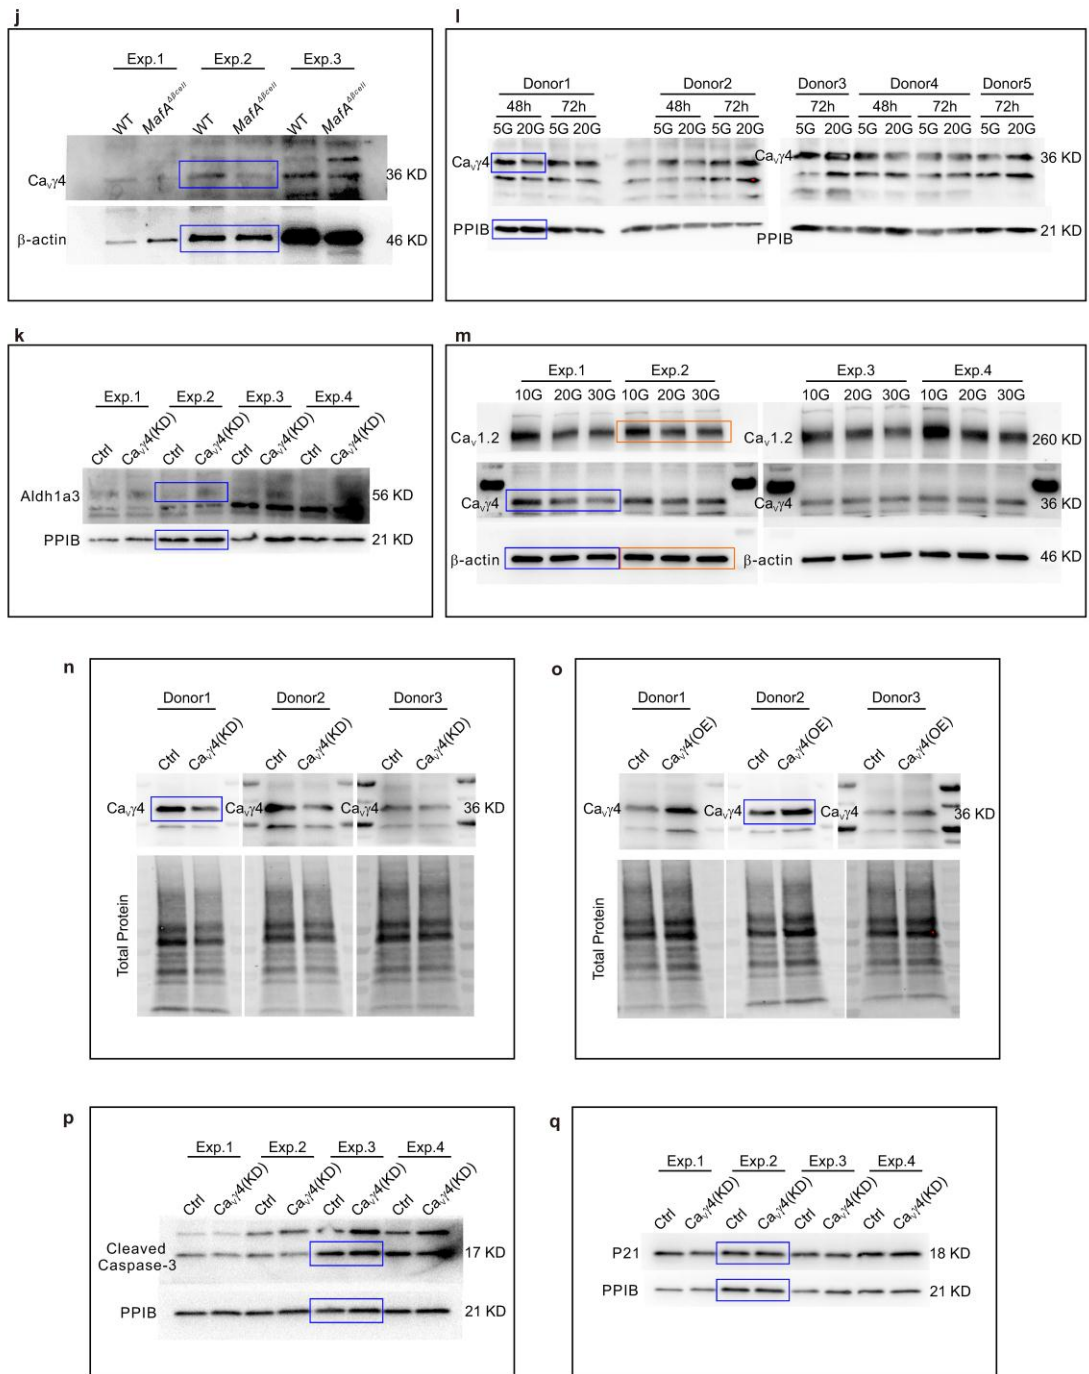

**Supplementary Figure 7. Full pictures of protein blots presented in the main paper.** Protein blots from which the blue or orange boxes correspond, with similar band order, to Figure 1g-h (a-b), Figure 4d (c-f), Figure 4e-f (g-h), Figure 5c-d and h (i-k), Supplementary Figure 1b and d (l and m (blue)), Supplementary Figure 2d and g (n-o), Supplementary Figure 4c (m (orange)), and Supplementary Figure 5d (p-q).



## Supplementary Table 1

Supplementary Table 1. Characteristics of human islet donors used for experiment.

|                           | All          | Non-diabetic | T2D        |
|---------------------------|--------------|--------------|------------|
|                           | (n=51)       | (n=37)       | (n=14)     |
| Age (years)               | 61 ± 11      | 60 ± 12      | 64 ± 9     |
| Sex (female/male)         | 20/31        | 16/21        | 4/10       |
| BMI (kg m <sup>-2</sup> ) | 27.1 ± 5.7 * | 26.1 ± 4.7 * | 29.5 ± 7.4 |
| HbA1c (%)                 | 5.9 ± 0.8 ** | 5.5 ± 0.4 ** | 6.9 ± 0.5  |
| Purity (%)                | 73 ± 20      | 70 ± 21      | 78 ± 12    |
| Days cultured             | 3 ± 1        | 3 ± 1        | 2 ± 1      |

Data are presented as mean ± s.d.

\* 1 missing value

\*\* 2 missing values
