# Supplementary material for: The calcium channel subunit gamma-4 is regulated by MafA and necessary for pancreatic beta-cell specification
Source: PubMed Central journal article supplement (PMC6420573; doi:10.1038/s42003-019-0351-4), 2019-03-15
Supplement: 42003_2019_351_MOESM2_ESM.pdf [file 42003_2019_351_MOESM2_ESM.pdf]

## **Description of Supplementary Data**

**File name:** Supplementary Data 1

**Description:** The Supplementary Data 1 file contains all source data underlying the graphs and charts presented in the main figures (Figure 1-6). The source data includes: Relative mRNA expressions, Fluorescence intensity, Relative protein expressions, Insulin secretion, The increase of beta-cell membrane capacitance, The whole cell  $\text{Ca}^{2+}$  currents, Intracellular  $\text{Ca}^{2+}$  concentration ( $[\text{Ca}^{2+}]_i$ ) peak intensity, Integrated  $\text{Ca}^{2+}$  load, Frequency of  $[\text{Ca}^{2+}]_i$  peaks, Human microarray mRNA expressions and Correlation of microarray mRNA expressions.
